# Supplementary material
Source: bioRxiv or medRxiv preprint supplement (https://www.biorxiv.org/highwire/filestream/120451/field_highwire_adjunct_files/0/398107-1.pdf)
Supplement: Supplementary file [file 398107-1.pdf]

## **Supplemental Materials**

Supplemental Figures S1-S7 & Legends

Supplemental Tables 1-6

Supplemental Files:

Supplemental File 1: SyntheticLibraryDesign.txt

Supplemental File 2: GenomicLibraryDesign.txt

Supplemental File 3: SYN\_ExpressionSummary.txt

Supplemental File 4: GEN\_ExpressionSummary.txt

Supplemental File 5: gkmSVM\_8merScoreWeights.txt

Supplemental File 6: gkmSVM\_8merTop50TOMTOMe27.txt

Supplemental File 7: SYN\_FeaturesiRF.txt

Supplemental File 8: gWT\_FeaturesiRF.txt

Supplemental File 9: SYN\_DemultiplexedBCcounts.zip

Supplemental File 10: GEN\_DemultiplexedBCcounts.zip

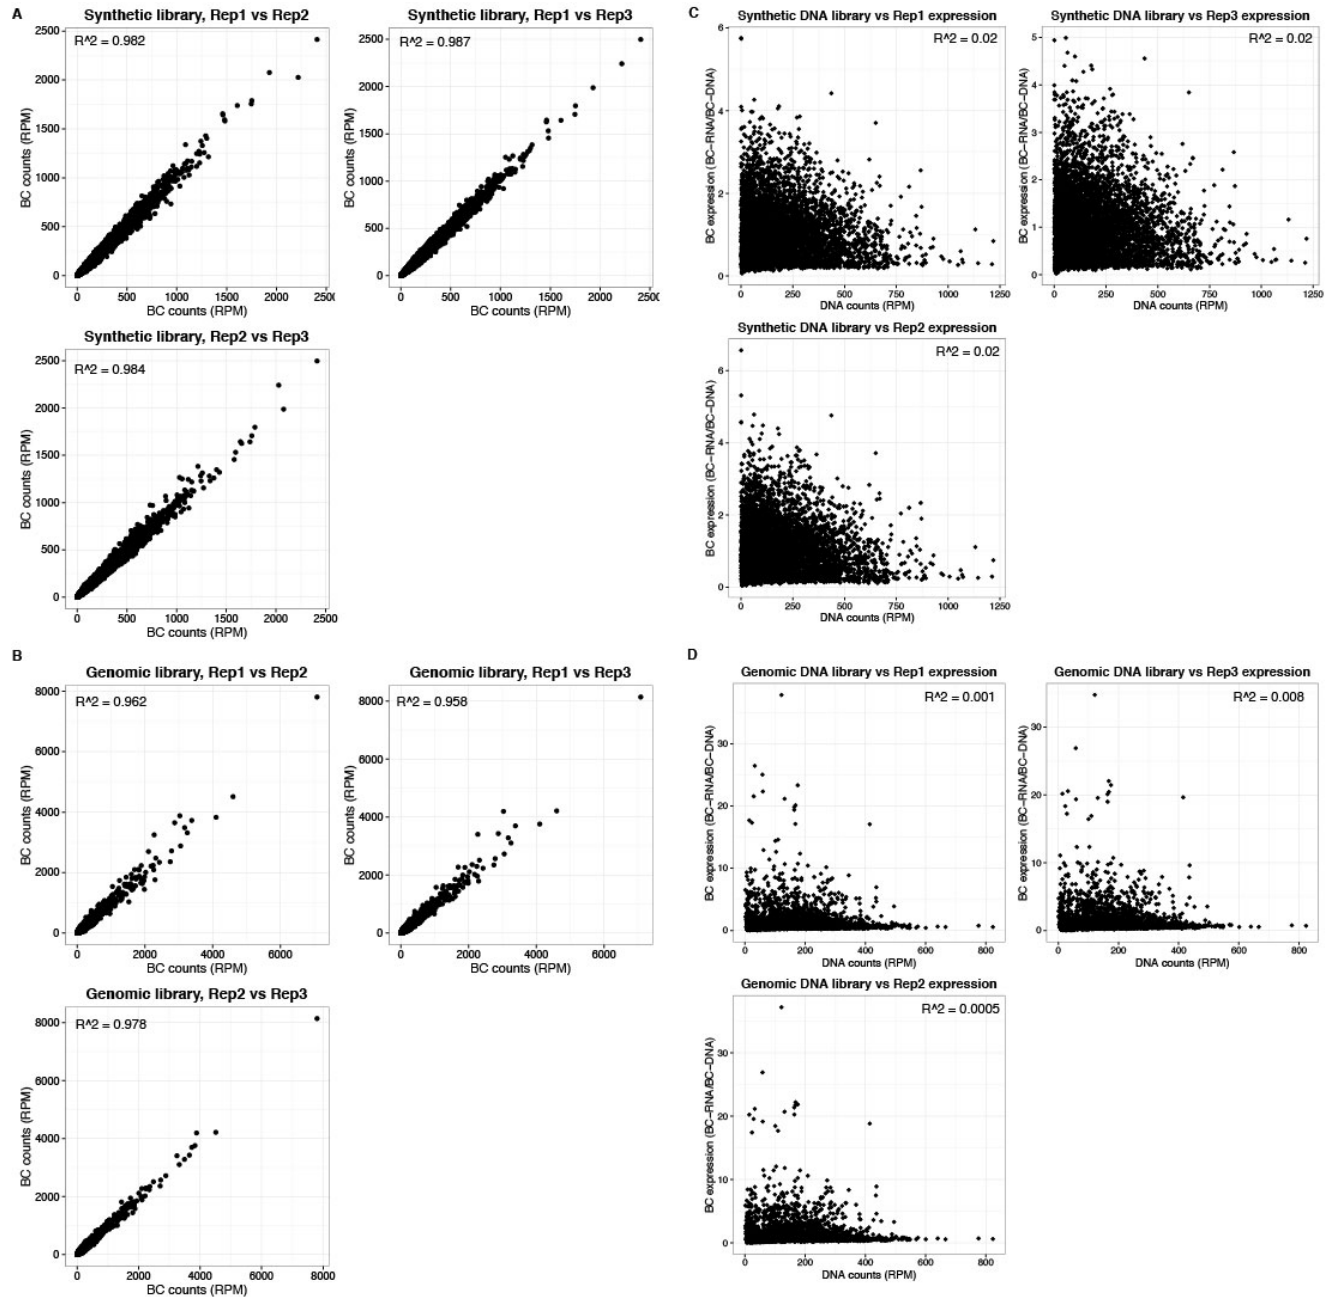

**Figure S1. MPRA data quality.** Reproducibility of barcode (BC) counts between biological replicates, normalized as reads per million per RNA replicate for **(A)** Synthetic library and **(B)** Genomic, gWT and gMUT, library. Comparison of normalized BC expression ( $BC_{RNA}/BC_{DNA}$ ) versus DNA counts for **(C)** Synthetic library and **(D)** Genomic, gWT and gMUT, library.

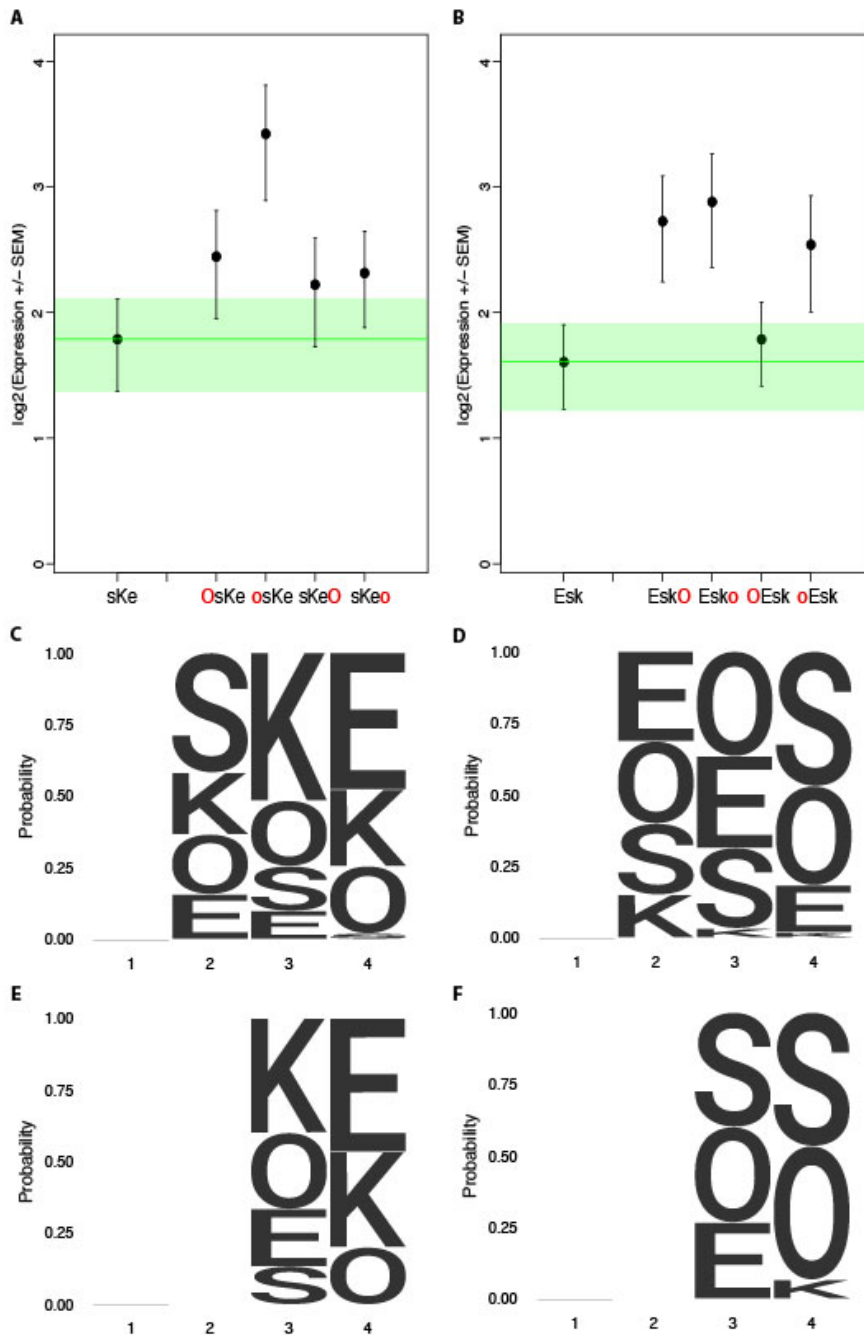

**Figure S2. Additional examples of non-additivity in synthetic elements.** Comparisons of synthetic 3-mer elements with matched 4-mer elements containing one additional site in the first or fourth position with (A) three of four matched 4-mers with overlapping expression despite an additional binding site and (B) one of four matched 4-mers with overlapping expression. Activity logos for the top 25% (C), bottom 25% (D) of 3-mer synthetic elements (n= 48 each), and top 25% (E), bottom 25% of 2-mer synthetic elements (n= 12 each). Height of letter is proportional to frequency of site in indicated position. Positions organized as in Figure 2.

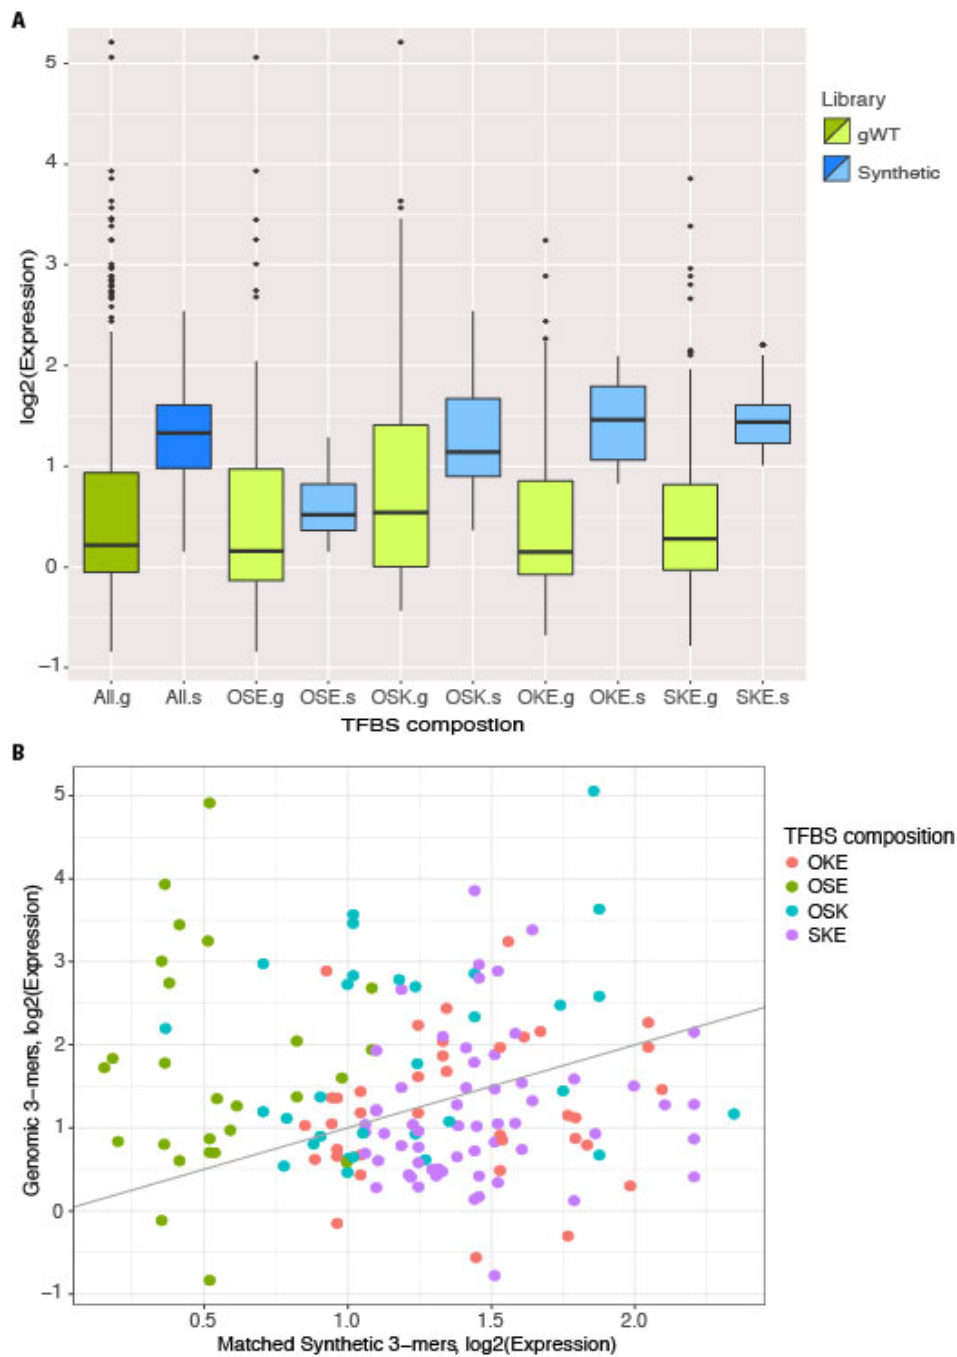

**Figure S3. Comparison of synthetic and genomic patterns of transcription factor binding sites (TFBSs).** (A) Expression ( $\log_2$ ) of all synthetic (dark blue) and gWT (dark green) library members subset by TFBS composition (light blue and light green, respectively). (B) Expression ( $\log_2$ ) of synthetic (x-axis) and gWT (y-axis) library members, matched by composition and order of binding sites for OCT4 (O), SOX2 (S), KLF4 (K), and ESRRB (E). Subsets of TFBS composition indicated by color. Grey line indicates x-y diagonal as axis scales differ.

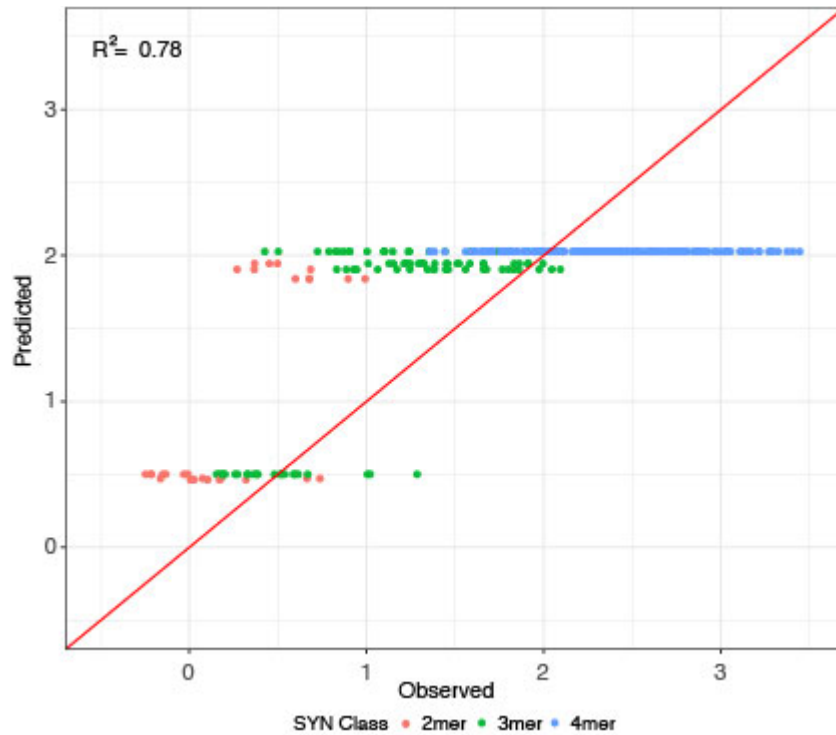

**Figure S4. Additive effects in synthetic elements.** Iterative random forest (iRF) regression model that includes features for only presence of pluripotency TFBSs to predict the relative expression of synthetic elements. Number of binding site per element indicated as in **Figure 3**. Observed and predicted expression are both plotted in  $\log_2$  space.

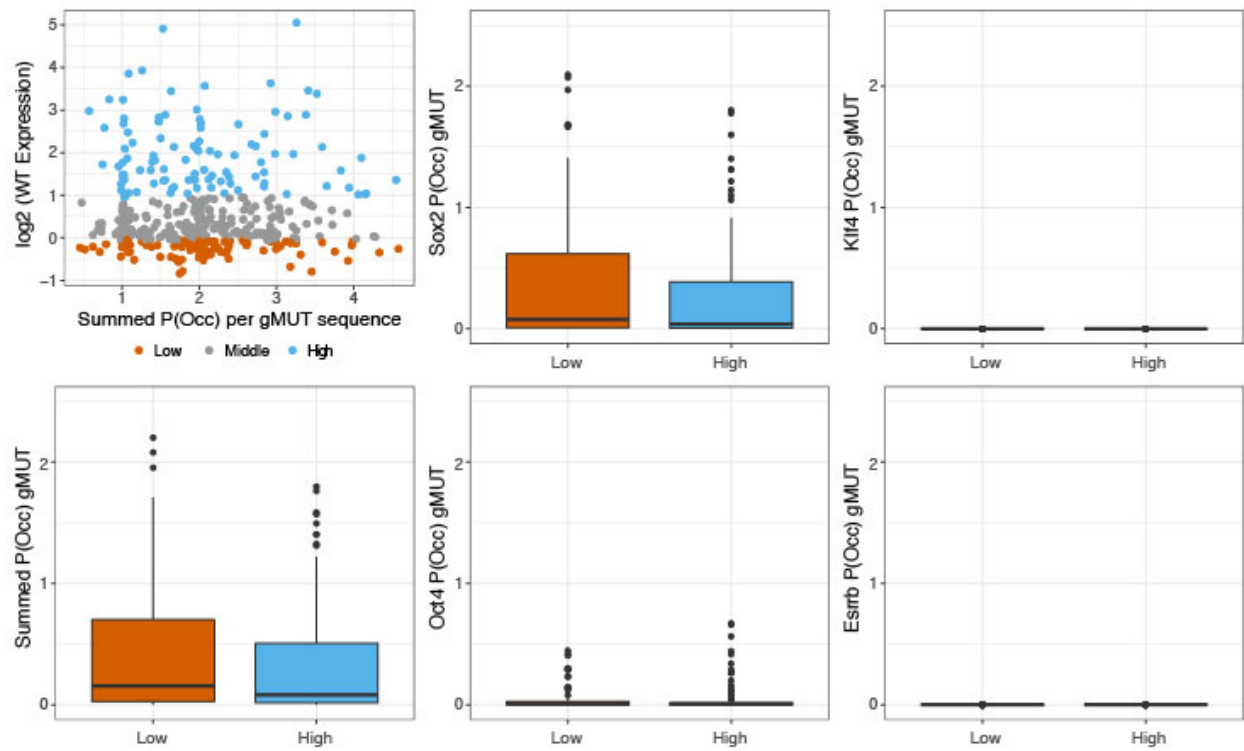

**Figure S5. Predicted occupancy of genomic sequences.** Predicted occupancy (P(Occ)) for genomic sequences in the absence of the primary pluripotency sites (gMUT sequences) for high assumed protein concentration ( $\mu$ ) for SOX2 ( $\mu = 8$ ), OCT4 ( $\mu = 10$ ), KLF4 ( $\mu = 8$ ), and ESRRB ( $\mu = 8$ ) shown in middle and right panels. Summed P(Occ) of all factors per gMUT sequence, compared to expression (top left panel) or binned as low or high library members (bottom 25% and top 25% of sequences, ranked by gWT expression,  $n = 101$ ).

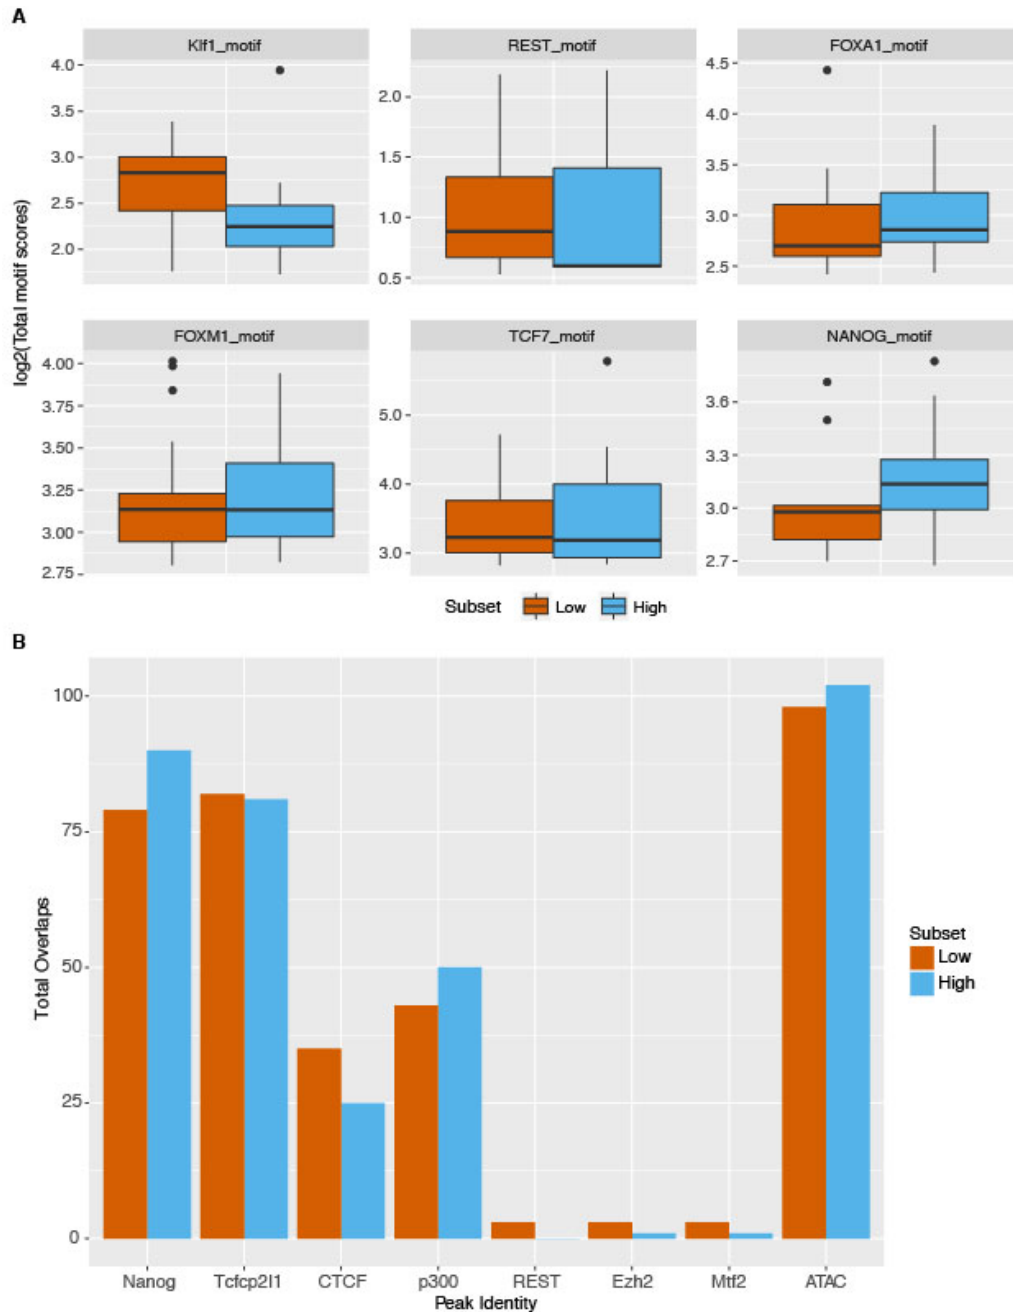

**Figure S6. Genomic sequences show signatures for other factors. (A)** Summed motif scores for indicated motif across genomic sequences, excluding primary pluripotency sites. Site scores output during motif scanning of high (top 25% as ranked by gWT expression, n = 101) and low (bottom 25% as ranked by gWT expression, n = 101) gMUT sequences to prevent scoring of O, S, K, or E TFBS sequences. **(B)** Overlapping TF occupancy, as measured by CHIP-seq, or accessibility, as measured by ATAC-seq, for high (top 25% as ranked by gWT expression, n = 101) and low (bottom 25% as ranked by gWT expression, n = 101) genomic sequence intervals.

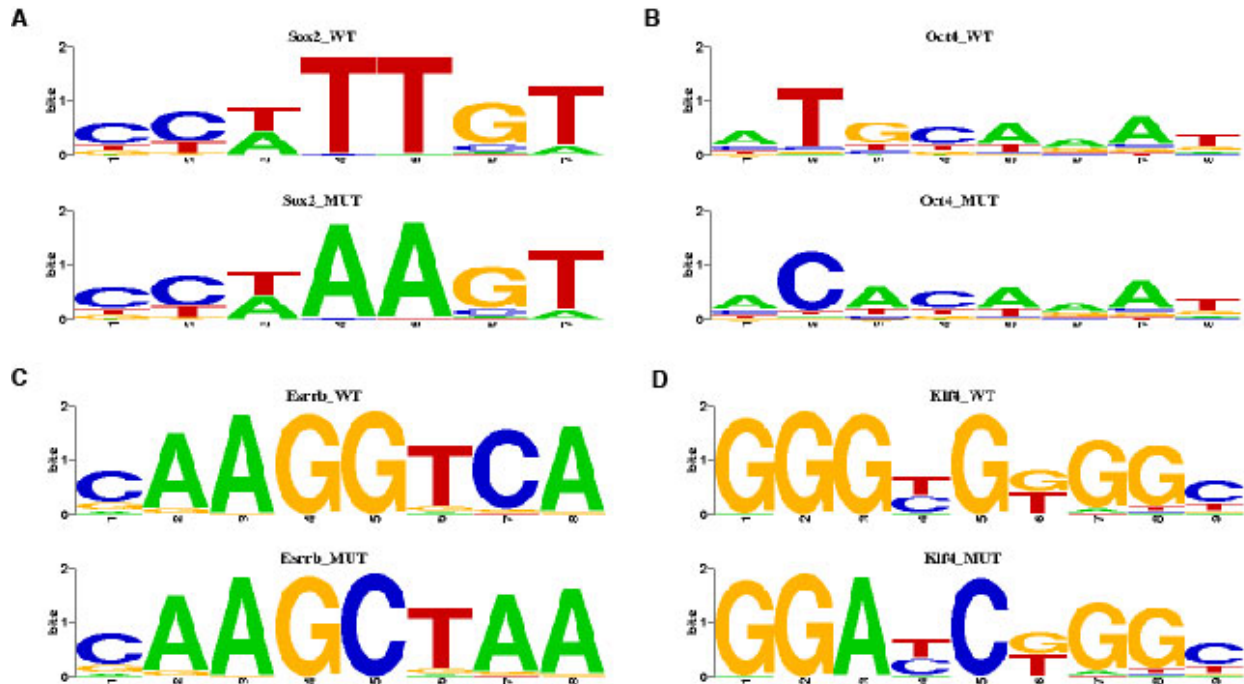

**Figure S7. Pluripotency motif substitutions for gMUT sequences.** Highest information content positions in each motif were substituted with least frequent nucleotide for that position. **(A)** For mutating Sox2 motifs, the reference nucleotides were substituted for 'A' in position 4 and 5. **(B)** For mutating Oct4 motifs, the reference nucleotide was substituted for 'C' in position 2 and for 'A' in position 3. **(C)** For mutating Esrrb motifs, the reference nucleotide was substituted for 'C' in position 5 and 'A' for position 7. **(D)** For mutating Klf4 motifs, the reference nucleotide was substituted for 'A' in position 3 and 'C' in position 5.



**Supplemental Table 1: SYN library composition**

| <b>Element class</b> | <b>Unique Elements</b> | <b>Unique Element-Barcode Pairs</b> |
|----------------------|------------------------|-------------------------------------|
| 2-mers               | 48                     | 384                                 |
| 3-mers               | 192                    | 1,536                               |
| 4-mers               | 384                    | 3,072                               |
| Basal                | 1                      | 112                                 |
| Total library size   | 625                    | 5,104                               |

**Supplemental Table 2: gWT site composition**

| <b>Sequence composition (Primary sites)</b> | <b>Unique Sequences</b> |
|---------------------------------------------|-------------------------|
| OKE                                         | 117                     |
| OSE                                         | 65                      |
| OSK                                         | 68                      |
| SKE                                         | 157                     |

**Supplemental Table 3: gWT/gMUT library composition**

| <b>Sequence class</b> | <b>Unique Sequences</b> | <b>Unique Sequence-Barcode Pairs</b> |
|-----------------------|-------------------------|--------------------------------------|
| gWT                   | 407                     | 3,256                                |
| gMUT                  | 407                     | 3,256                                |
| Basal                 | 1                       | 112                                  |
| Total library size    | 815                     | 6,624                                |

**Supplemental Table 4: Primer sequences**

| <b>Name</b>     | <b>Sequence</b>                                                                 | <b>Demultiplexing BC</b> |
|-----------------|---------------------------------------------------------------------------------|--------------------------|
| Synthetic_FW-1  | CTTCTACTACTAGGGCCCA                                                             | -                        |
| Synthetic_Rev-2 | CATGAACTAGCATGTAGAGCTC                                                          | -                        |
| Genomic_FW-1    | GACTTACATTAGGGCCCGT                                                             | -                        |
| Genomic_Rev-1   | CAGTATCGTAGTCCGAGCTC                                                            | -                        |
| CF121           | TAGCGTCGAGGACATCAAGA                                                            | -                        |
| CF122           | TGGTTTGTCCAAACTCATCAA                                                           | -                        |
| CF150           | TACACCGTGGTGGAGCAGTA                                                            | -                        |
| CF151b          | AGCGTACTCGAGTTGTTAACTTGTTTATTGCAGCTT                                            | -                        |
| CF52            | AATGATACGGCGACCACCGAG                                                           | -                        |
| CF53            | CAAGCAGAAGACGGCATA CGA                                                          | -                        |
| P1_Xbal_1_F     | AATGATACGGCGACCACCGAGATCTACACTCTTTCCCTACA<br>CGACGCTCTTCCGATCTAACCTCA           | AACCTCA                  |
| P1_Xbal_1_R     | /5Phos/C*TAGTGAGGTTAGATCGGAAGAGCGTCGTGTAGGG<br>AAAGAGGTAGATCTCGGTGGTGCCTGATCATT | AACCTCA                  |
| P1_Xbal_2_F     | AATGATACGGCGACCACCGAGATCTACACTCTTTCCCTACA<br>CGACGCTCTTCCGATCTTCTAAGC           | TCTAAGC                  |
| P1_Xbal_2_R     | /5Phos/C*TAGGCTTAGAAGATCGGAAGAGCGTCGTGTAGGG<br>AAAGAGGTAGATCTCGGTGGTGCCTGATCATT | TCTAAGC                  |
| P1_Xbal_3_F     | AATGATACGGCGACCACCGAGATCTACACTCTTTCCCTACA<br>CGACGCTCTTCCGATCTCTGTCAT           | CTGTCAT                  |
| P1_Xbal_3_R     | /5Phos/C*TAGATGACAGAGATCGGAAGAGCGTCGTGTAGGG<br>AAAGAGGTAGATCTCGGTGGTGCCTGATCATT | CTGTCAT                  |
| P1_Xbal_4_F     | AATGATACGGCGACCACCGAGATCTACACTCTTTCCCTACA<br>CGACGCTCTTCCGATCTGGAGGTG           | GGAGGTG                  |
| P1_Xbal_4_R     | /5Phos/C*TAGCACCTCCAGATCGGAAGAGCGTCGTGTAGGG<br>AAAGAGGTAGATCTCGGTGGTGCCTGATCATT | GGAGGTG                  |
| P1_Xbal_5_F     | AATGATACGGCGACCACCGAGATCTACACTCTTTCCCTACA<br>CGACGCTCTTCCGATCTGCTCGAT           | GCTCGAT                  |
| P1_Xbal_5_R     | /5Phos/C*TAGATCGAGCAGATCGGAAGAGCGTCGTGTAGGG<br>AAAGAGGTAGATCTCGGTGGTGCCTGATCATT | GCTCGAT                  |

|                      |                                                                                     |         |
|----------------------|-------------------------------------------------------------------------------------|---------|
| P1_Xbal_6_F          | AATGATACGGCGACCACCGAGATCTACACTCTTTCCCTACA<br>CGACGCTCTTCCGATCTTAGAGTA               | TAGAGTA |
| P1_Xbal_6_R          | /5Phos/C*TAGTACTCTAAGATCGGAAGAGCGTCGTGTAGGG<br>AAAGAGGTAGATCTCGGTGGTCGCCGTATCATT    | TAGAGTA |
| P1_Xbal_7_F          | AATGATACGGCGACCACCGAGATCTACACTCTTTCCCTACA<br>CGACGCTCTTCCGATCTTCAGTCT               | TCAGTCT |
| P1_Xbal_7_R          | /5Phos/C*TAGAGACTGAAGATCGGAAGAGCGTCGTGTAGGG<br>AAAGAGGTAGATCTCGGTGGTCGCCGTATCATT    | TCAGTCT |
| P1_Xbal_8_F          | AATGATACGGCGACCACCGAGATCTACACTCTTTCCCTACA<br>CGACGCTCTTCCGATCTTTCCAAG               | TTCCAAG |
| P1_Xbal_8_R          | /5Phos/C*TAGCTTGGAAGATCGGAAGAGCGTCGTGTAGGG<br>AAAGAGGTAGATCTCGGTGGTCGCCGTATCATT     | TTCCAAG |
| PE2_SIC69_Sal1_<br>F | /5Phos/T*CGAAGATCGGAAGAGCACACGTCTGAACTCCAGT<br>CACAGCGTGCCCATCTCGTATGCCGTCTTCTGCTTG | -       |
| PE2_SIC69_Sal1_<br>R | CAAGCAGAAGACGGCATACGAGATGGGCACGCTGTGACTG<br>GAGTTCAGACGTGTGCTCTTCCGATCT             | -       |

**Supplemental Table 5: iRF SYN feature matrix**

| Model comparison                         | Billboard model | Positional model |                                                                                                                                                                                                                                   |
|------------------------------------------|-----------------|------------------|-----------------------------------------------------------------------------------------------------------------------------------------------------------------------------------------------------------------------------------|
| <b>Test Set, R<sup>2</sup> (overall)</b> | 0.56            | 0.87             |                                                                                                                                                                                                                                   |
| <b>Test Set, R<sup>2</sup> (4mers)</b>   | 0.00            | 0.52             |                                                                                                                                                                                                                                   |
| Features included                        |                 |                  | Source                                                                                                                                                                                                                            |
| O_presence                               | Yes             | Yes              | Same terms used for SYN iRF Billboard Model. Identity of TFBSs present in the sequence are determined via FIMO.                                                                                                                   |
| S_presence                               | Yes             | Yes              |                                                                                                                                                                                                                                   |
| K_presence                               | Yes             | Yes              |                                                                                                                                                                                                                                   |
| E_presence                               | Yes             | Yes              |                                                                                                                                                                                                                                   |
| Position.4_O                             | (-)             | Yes              | Same terms used for SYN Billboard + Position iRF Model. Relative position of pluripotency TFBSs as determined via FIMO; as sequences contain only three primary sites Position.1 is FALSE for all factors and omitted from table. |
| Position.4_S                             | (-)             | Yes              |                                                                                                                                                                                                                                   |
| Position.4_K                             | (-)             | Yes              |                                                                                                                                                                                                                                   |
| Position.4_E                             | (-)             | Yes              |                                                                                                                                                                                                                                   |
| Position.3_O                             | (-)             | Yes              |                                                                                                                                                                                                                                   |
| Position.3_S,                            | (-)             | Yes              |                                                                                                                                                                                                                                   |
| Position.3_K                             | (-)             | Yes              |                                                                                                                                                                                                                                   |
| Position.3_E                             | (-)             | Yes              |                                                                                                                                                                                                                                   |
| Position.2_O                             | (-)             | Yes              |                                                                                                                                                                                                                                   |
| Position.2_S                             | (-)             | Yes              |                                                                                                                                                                                                                                   |
| Position.2_K                             | (-)             | Yes              |                                                                                                                                                                                                                                   |
| Position.2_E                             | (-)             | Yes              |                                                                                                                                                                                                                                   |
| Position.1_O                             | (-)             | Yes              |                                                                                                                                                                                                                                   |
| Position.1_S                             | (-)             | Yes              |                                                                                                                                                                                                                                   |
| Position.1_K                             | (-)             | Yes              |                                                                                                                                                                                                                                   |
| Position.1_E                             | (-)             | Yes              |                                                                                                                                                                                                                                   |

**Supplemental Table 6: iRF gWT Feature Matrix**

| Model Comparison  | Billboard | Positional | Spacing | Primary sites | ChIP | All  |                                                          |
|-------------------|-----------|------------|---------|---------------|------|------|----------------------------------------------------------|
| <b>AUROC</b>      | 0.52      | 0.47       | 0.52    | 0.64          | 0.56 | 0.67 |                                                          |
| <b>AUPRC</b>      | 0.22      | 0.25       | 0.31    | 0.34          | 0.29 | 0.46 |                                                          |
| Features included |           |            |         |               |      |      | Source                                                   |
| O_presence        | Yes       | Yes        | (-)     | (-)           | (-)  | (-)  | Same terms used for SYN iRF Billboard Model. Identity of |

|                     |     |     |     |     |     |     |                                                                                                                                                                                                                         |
|---------------------|-----|-----|-----|-----|-----|-----|-------------------------------------------------------------------------------------------------------------------------------------------------------------------------------------------------------------------------|
| S_presence          | Yes | Yes | (-) | (-) | (-) | (-) | TFBSs present in the sequence are determined via FIMO.                                                                                                                                                                  |
| K_presence          | Yes | Yes | (-) | (-) | (-) | (-) |                                                                                                                                                                                                                         |
| E_presence          | Yes | Yes | (-) | (-) | (-) | (-) |                                                                                                                                                                                                                         |
| Position.4_O        | (-) | Yes | (-) | (-) | (-) | (-) | Same terms used for SYN Positional iRF Model. Relative position of pluripotency TFBSs as determined via FIMO; as sequences contain only three primary sites Position.1 is FALSE for all factors and omitted from table. |
| Position.4_S        | (-) | Yes | (-) | (-) | (-) | (-) |                                                                                                                                                                                                                         |
| Position.4_K        | (-) | Yes | (-) | (-) | (-) | (-) |                                                                                                                                                                                                                         |
| Position.4_E        | (-) | Yes | (-) | (-) | (-) | (-) |                                                                                                                                                                                                                         |
| Position.3_O        | (-) | Yes | (-) | (-) | (-) | (-) |                                                                                                                                                                                                                         |
| Position.3_S,       | (-) | Yes | (-) | (-) | (-) | (-) |                                                                                                                                                                                                                         |
| Position.3_K        | (-) | Yes | (-) | (-) | (-) | (-) |                                                                                                                                                                                                                         |
| Position.3_E        | (-) | Yes | (-) | (-) | (-) | (-) |                                                                                                                                                                                                                         |
| Position.2_O        | (-) | Yes | (-) | (-) | (-) | (-) |                                                                                                                                                                                                                         |
| Position.2_S        | (-) | Yes | (-) | (-) | (-) | (-) |                                                                                                                                                                                                                         |
| Position.2_K        | (-) | Yes | (-) | (-) | (-) | (-) |                                                                                                                                                                                                                         |
| Position.2_E        | (-) | Yes | (-) | (-) | (-) | (-) |                                                                                                                                                                                                                         |
| Distance_O.S        | (-) | (-) | Yes | (-) | (-) | Yes | Distance between FIMO identified sites (OCT4, SOX2, KLF4, & ESRRB); if a site is absent from the sequence distance between the two factors is sent to total length of sequence (81 or 82 bps).                          |
| Distance_K.E        | (-) | (-) | Yes | (-) | (-) | Yes |                                                                                                                                                                                                                         |
| Distance_K.O        | (-) | (-) | Yes | (-) | (-) | Yes |                                                                                                                                                                                                                         |
| Distance_K.S        | (-) | (-) | Yes | (-) | (-) | Yes |                                                                                                                                                                                                                         |
| Distance_E.S        | (-) | (-) | Yes | (-) | (-) | Yes |                                                                                                                                                                                                                         |
| Distance_E.O        | (-) | (-) | Yes | (-) | (-) | Yes |                                                                                                                                                                                                                         |
| Distance_1.2        | (-) | (-) | Yes | (-) | (-) | Yes | Distance between sites, regardless of identity, present in sequences (1st to 2nd, 2nd to 3rd site).                                                                                                                     |
| Distance_2.3        | (-) | (-) | Yes | (-) | (-) | Yes |                                                                                                                                                                                                                         |
| Total_spacing       | (-) | (-) | (-) | (-) | (-) | Yes | Sum of 'Distance_1.2' and 'Distance_2.3'                                                                                                                                                                                |
| Oct4.site_affinity  | (-) | (-) | (-) | Yes | (-) | Yes | Scores assigned by FIMO, a log-likelihood score ratio based on the PWM provided (Grant et al. 2011).                                                                                                                    |
| Sox2.site_affinity  | (-) | (-) | (-) | Yes | (-) | Yes |                                                                                                                                                                                                                         |
| Klf4.site_affinity  | (-) | (-) | (-) | Yes | (-) | Yes |                                                                                                                                                                                                                         |
| Esrrb.site_affinity | (-) | (-) | (-) | Yes | (-) | Yes |                                                                                                                                                                                                                         |
| OSKE_TotalAffinity  | (-) | (-) | (-) | (-) | (-) | Yes | Sum of OCT4, SOX2, KLF4, & ESRRB site affinities for each sequence (above terms)                                                                                                                                        |

|                         |     |     |     |     |     |     |                                                                                                                                                                                                                           |
|-------------------------|-----|-----|-----|-----|-----|-----|---------------------------------------------------------------------------------------------------------------------------------------------------------------------------------------------------------------------------|
| Oct4.Occ_10             | (-) | (-) | (-) | (-) | (-) | Yes | Total predicted occupancy across the sequence for each pluripotency factor, annotated with custom code (See Methods)                                                                                                      |
| Sox2.Occ_8              | (-) | (-) | (-) | (-) | (-) | Yes |                                                                                                                                                                                                                           |
| Klf4.Occ_8              | (-) | (-) | (-) | (-) | (-) | Yes |                                                                                                                                                                                                                           |
| Essrb.Occ_8             | (-) | (-) | (-) | (-) | (-) | Yes |                                                                                                                                                                                                                           |
| OSKE_P(Occ)             | (-) | (-) | (-) | (-) | (-) | Yes | Sum of predicted occupancies for pluripotency factors (above terms)                                                                                                                                                       |
| Klf1_Mut.count          | (-) | (-) | (-) | (-) | (-) | Yes | Number of identified sites for gMUT sequences scanned using FIMO with PWMs of SVM supported factors. gMUT sequences were scored to prevent assigning a score for another factor to any of the primary pluripotency sites. |
| REST_Mut.count          | (-) | (-) | (-) | (-) | (-) | Yes |                                                                                                                                                                                                                           |
| FOXA1_Mut.count         | (-) | (-) | (-) | (-) | (-) | Yes |                                                                                                                                                                                                                           |
| FOXM1_Mut.count         | (-) | (-) | (-) | (-) | (-) | Yes |                                                                                                                                                                                                                           |
| TCF7_Mut.count          | (-) | (-) | (-) | (-) | (-) | Yes |                                                                                                                                                                                                                           |
| NANOG_Mut.count         | (-) | (-) | (-) | (-) | (-) | Yes |                                                                                                                                                                                                                           |
| KLF1_Mut.Total Affinity | (-) | (-) | (-) | (-) | (-) | Yes | Sum of scores assigned for FIMO scanning with PWMs of SVM supported factors for gMUT sequences. gMUT sequences were scored to prevent assigning a score for another factor to primary pluripotency sites.                 |
| REST_Mut.Total Affinity | (-) | (-) | (-) | (-) | (-) | Yes |                                                                                                                                                                                                                           |
| FOXA1_Mut.TotalAffinity | (-) | (-) | (-) | (-) | (-) | Yes |                                                                                                                                                                                                                           |
| FOXM1_Mut.TotalAffinity | (-) | (-) | (-) | (-) | (-) | Yes |                                                                                                                                                                                                                           |
| TCF7_Mut.Total Affinity | (-) | (-) | (-) | (-) | (-) | Yes |                                                                                                                                                                                                                           |
| NANOG_Mut.TotalAffinity | (-) | (-) | (-) | (-) | (-) | Yes |                                                                                                                                                                                                                           |
| SVM_TotalAffinity       | (-) | (-) | (-) | (-) | (-) | Yes | Sum of KLF1, REST, FOXA1, FOXM1, TCF7, & Nanog site affinities (above).                                                                                                                                                   |
| Total_site_affinity     | (-) | (-) | (-) | (-) | (-) | Yes | Sum of 'SVM_TotalAffinity' and 'OSKE_TotalAffinity'.                                                                                                                                                                      |
| Oct4_ChIP               | (-) | (-) | (-) | (-) | Yes | Yes | Chen et al. ChIP-seq overlaps. GEO dataset: GSE11431; GEO IDs: GSM288346 (O),                                                                                                                                             |
| Sox2_ChIP               | (-) | (-) | (-) | (-) | Yes | Yes |                                                                                                                                                                                                                           |
| Klf4_ChIP               | (-) | (-) | (-) | (-) | Yes | Yes |                                                                                                                                                                                                                           |

|               |     |     |     |     |     |     |                                                                                                                                                                                       |
|---------------|-----|-----|-----|-----|-----|-----|---------------------------------------------------------------------------------------------------------------------------------------------------------------------------------------|
| Essrb_ChIP    | (-) | (-) | (-) | (-) | Yes | Yes | GSM288347 (S), GSM288354 (K), GSM288355 (E); E14 mESCs.                                                                                                                               |
| Nanog         | (-) | (-) | (-) | (-) | Yes | Yes | Additional ChIP-seq peaks from Chen et al. GEO dataset: GSE11431; GEO IDs: GSM288345 (Nanog), GSM288350 (Tcfcp2l1), GSM288351 (CTCF), GSM288359 (p300); E14 mESCs.                    |
| Tcfcp2l1      | (-) | (-) | (-) | (-) | Yes | Yes |                                                                                                                                                                                       |
| CTCF          | (-) | (-) | (-) | (-) | Yes | Yes |                                                                                                                                                                                       |
| p300          | (-) | (-) | (-) | (-) | Yes | Yes |                                                                                                                                                                                       |
| Peak_count    | (-) | (-) | (-) | (-) | (-) | Yes | Total overlapping pluripotency ChIP seq signals for all peaks from Chen et al. (above), including O,S,K,E, Nanog, Tcfcp2l1, CTCF, & p300.                                             |
| REST          | (-) | (-) | (-) | (-) | Yes | Yes | ChIP-seq from Yu et al. PMID: 21632747; GEO dataset: GSE28233; GEO ID: GSM698696; E14 mESCs.                                                                                          |
| Mtf2          | (-) | (-) | (-) | (-) | Yes | Yes | ChIP-seq from Perino et al. PMID: 29808031; GEO dataset: GSE94300; MAnorm bed files from dataset used for respective factors; E14 mESCs.                                              |
| Ezh2          | (-) | (-) | (-) | (-) | Yes | Yes |                                                                                                                                                                                       |
| H3K27me3      | (-) | (-) | (-) | (-) | Yes | Yes |                                                                                                                                                                                       |
| H3K4me3       | (-) | (-) | (-) | (-) | Yes | Yes |                                                                                                                                                                                       |
| ATAC          | (-) | (-) | (-) | (-) | Yes | Yes | ATAC-seq from Wu et al. PMID: 27309802; GEO ID: GSM2156965; 50k cell stage of mESCs.                                                                                                  |
| H3K27ac       | (-) | (-) | (-) | (-) | Yes | Yes | All files downloaded from www.encodeproject.org. Note: all data sets from Yue et al. (PMID: 25409824) are under review due to library complexity and/or read depth issues. E14 mESCs. |
| H3K36me3      | (-) | (-) | (-) | (-) | Yes | Yes |                                                                                                                                                                                       |
| H3K4me1Ren    | (-) | (-) | (-) | (-) | Yes | Yes |                                                                                                                                                                                       |
| H3K4me1Snyder | (-) | (-) | (-) | (-) | Yes | Yes |                                                                                                                                                                                       |
| H3K4me3Ren    | (-) | (-) | (-) | (-) | Yes | Yes |                                                                                                                                                                                       |
| H3K4me3Snyder | (-) | (-) | (-) | (-) | Yes | Yes |                                                                                                                                                                                       |
| H3K9ac        | (-) | (-) | (-) | (-) | Yes | Yes |                                                                                                                                                                                       |
| H3K9me3       | (-) | (-) | (-) | (-) | Yes | Yes |                                                                                                                                                                                       |
